# Supplementary material
Source: PubMed Central journal article supplement (PMC3896299)
Supplement: NIHMS523645-supplement-01.pdf [file NIHMS523645-supplement-01.pdf]

## Appendix

### Supplementary Figure

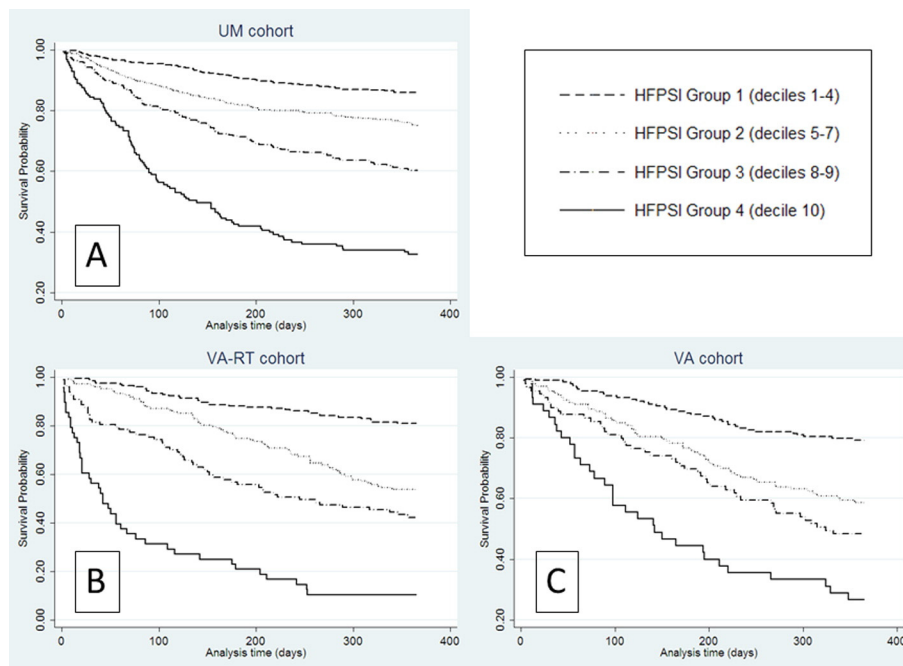

Survival free of death and all-cause medical hospitalization, HFPSI score decile groups (12-month follow-up).

**Supplementary Table.** Predictors of 12-month mortality and/or medical hospitalization (n = 1536, 427 outcomes)

| Variable                    | UM cohort, univariable predictors |                       |       | UM cohort, final HFPSI model |                       |       |
|-----------------------------|-----------------------------------|-----------------------|-------|------------------------------|-----------------------|-------|
|                             | Coefficient                       | Hazard ratio (95% CI) | P     | Coefficient                  | Hazard ratio (95% CI) | P     |
| BUN (per mg/dL)             | 0.023                             | 1.02 (1.02-1.03)      | <.001 | 0.009                        | 1.01 (1.00-1.01)      | .001  |
| BNP (pg/mL; per log)        | 0.296                             | 1.34 (1.25-1.44)      | <.001 | 0.160                        | 1.17 (1.09-1.27)      | <.001 |
| NYHA class                  |                                   |                       |       |                              |                       |       |
| I                           |                                   | Reference             |       |                              | Reference             |       |
| II                          | 0.512                             | 1.67 (1.12-2.47)      | .01   | 0.299                        | 1.35 (0.91-2.01)      | .14   |
| III                         | 0.877                             | 2.40 (1.56-3.70)      | <.001 | 0.491                        | 1.63 (1.06-2.53)      | .03   |
| IV                          | 1.506                             | 4.51 (2.51-8.11)      | <.001 | 0.624                        | 1.87 (1.02-3.42)      | .04   |
| Diabetes mellitus           | 0.560                             | 1.75 (1.45-2.12)      | <.001 | 0.370                        | 1.45 (1.19-1.77)      | <.001 |
| Atrial fibrillation/flutter | 0.601                             | 1.82 (1.51-2.21)      | <.001 | 0.339                        | 1.40 (1.15-1.71)      | .001  |
| Hospitalization within:     |                                   |                       |       |                              |                       |       |
| 1 mo                        | 1.346                             | 3.84 (2.93-5.04)      | <.001 | 1.030                        | 2.80 (2.12-3.70)      | <.001 |
| 2-6 mo                      | 0.752                             | 2.12 (1.73-2.60)      | <.001 | 0.548                        | 1.73 (1.40-2.13)      | <.001 |
